# Supplementary material for: The SMC5/6 Complex Represses the Replicative Program of High-Risk Human Papillomavirus Type 31
Source: MDPI journal article supplement (doi:10.3390/pathogens9100786), 2020-09-25
Supplement: s1 [file s1]

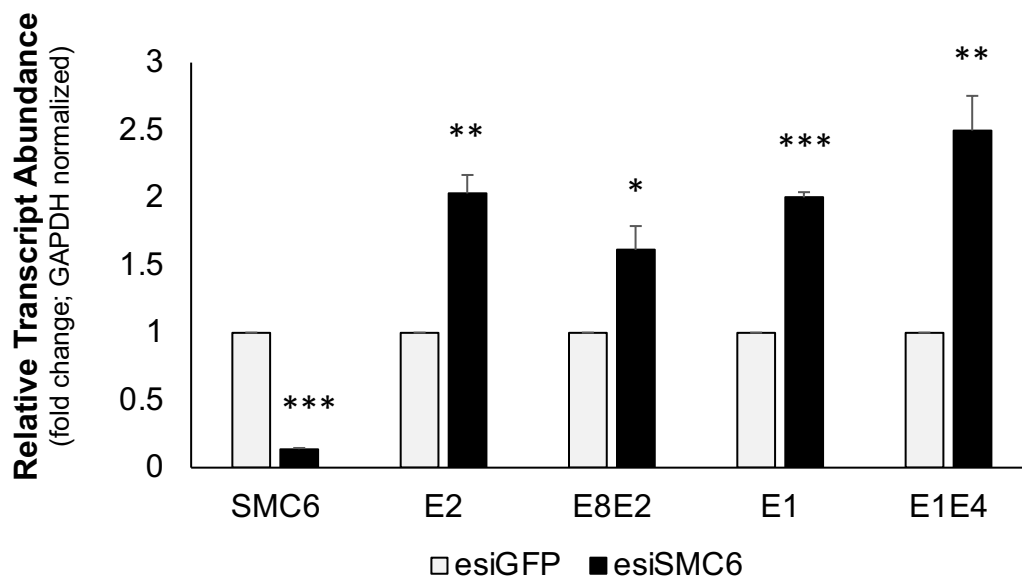

**Supplementary Figure 1. SMC6 knockdown increases HPV-31 transcript abundance in CIN612-9E cells.** Forty-eight hour siRNA knockdown of SMC6 resulted in decreased SMC6 and increased HPV-31 E2, E8E2, E1 and E1E4 transcripts in CIN612-9E cells.  $C_t$  values were normalized to GAPDH and fold change shown relative to control (set to 1;  $n=3$ ). The experiments was performed 3 independent times and statistical significance determined by two-tailed Student's T-test where \* =  $p \leq 0.05$ , \*\* =  $p \leq 0.005$  and \*\*\*  $p = \leq 0.0005$ .
